# Supplementary material
Source: PubMed Central journal article supplement (PMC4524357)
Supplement: NIHMS612548-supplement-303829DR2_Online_Data_Supplement.pdf [file NIHMS612548-supplement-303829DR2_Online_Data_Supplement.pdf]

**SUPPLEMENTAL MATERIAL****PGC-1 $\alpha$  Induces SPP1 to Activate Macrophages and Orchestrate Functional Angiogenesis in Skeletal Muscle**

Glenn C. Rowe, PhD<sup>1\*</sup>, Srilatha Raghuram, PhD<sup>1\*</sup>, Cholsoon Jang, MS<sup>1</sup>, Janice A. Nagy, PhD<sup>2,3</sup>, Ian S. Patten, MS<sup>1</sup>, Amrita Goyal, BS<sup>1</sup>, Mun Chun Chan, PhD<sup>1</sup>, Laura X. Liu, BA<sup>1</sup>, Aihua Jiang, MD, PhD<sup>1</sup>, Katherine C Spokes, BA<sup>2</sup>, David Beeler, MS<sup>2</sup>, Harold Dvorak, MD<sup>2,3</sup>, William Aird, MD<sup>2</sup>, Zolt Arany, MD, PhD<sup>1,2</sup>.

<sup>1</sup>Cardiovascular Institute, Beth Israel Deaconess Medical Center and Harvard Medical School, Boston, Massachusetts 02115, USA.

<sup>2</sup>Center for Vascular Biology Research, Beth Israel Deaconess Medical Center and Harvard Medical School, Boston, Massachusetts 02115, USA.

<sup>3</sup>Department of Pathology, Beth Israel Deaconess Medical Center and Harvard Medical School, Boston, Massachusetts 02115, USA.

\*contributed equally

## SUPPLEMENTAL ONLINE DETAILED METHODS

### Animals

All animal experiments were performed according to procedures approved by the Institutional Animal Care and Use Committee. MCK-TTA and TRE-PGC-1 $\alpha$ -inducible mice<sup>1</sup> were obtained from Dr. Daniel Kelly at Washington University St Louis (now at Sanford Burnham Institute, Florida) and are in a mixed C57Bl/6 and 129 strain. 10-12 week old mice were used for all experiments unless specified. Littermate controls were used in all experiments. No differences were observed between genders, and thus genders were mixed. Purina chow containing doxycycline (200 mg/kg), 45% fat were all purchased from Research Diet Inc., New Brunswick, NJ). For the old, diabetic mice experiments; 2 year old mice were used. sVEGFR1 mice were kindly provided by Dr. Eli Keshet, Jerusalem, Israel<sup>2</sup>. SPP1 -/- mice were purchased from Jackson Labs (Stock No. 004936). TRE-VEGFA mice were generated by subcloning the murine VEGFA120 pro-peptide into the HPRT-targeting vector pMP8-II containing the tet-responsive promoter. ES cells were then generated by homologous recombination, and chimeras were bred for germline transmission. Transgenic mice were then bred with MCK-TTA mice to drive expression in skeletal muscle. All transgenic animals were maintained hemizygous.

### Cells and Reagents

Immunostaining was performed using anti-CD31 antibody (BD Pharmingen) and anti PDGFR $\beta$  antibody (R&D Systems). Human umbilical cord endothelial cells (HUVECs) and C2C12 cells were maintained in endothelial basal medium-2 (EBM-2) and Dulbecco's modified Eagle's medium (DMEM; supplemented with 10% fetal bovine serum(FBS)), respectively. C2C12 cells were differentiated in DMEM (2% horse serum).

Primary skeletal myocytes were isolated from ERR $\alpha$ KO and wildtype animals were performed on entire hindlimb muscle after collagenase/dispase digestion, as described previously<sup>3</sup>. Cell were maintained in Ham's F10; supplemented with 20% FBS and 2.5ng/ml basic fibroblast growth factor (bFGF)) and switched into differentiation media (DMEM (5% horse serum)). Cells were infected with adenovirus expressing GFP or PGC-1 $\alpha$  at a multiplicity of infection (MOI) of 10–30, for 48 hrs prior to harvesting and processing of mRNA.

THP-1 cells (ATCC) were seeded in DMEM and 20% FBS at  $1 \times 10^5$  cells/well in 24 well plates, and differentiated with 10ng/mL PMA for 48 hours. After differentiation, THP-1 cells were incubated with control, PGC-1 $\alpha$  or SPP1 conditioned medium for 24 hrs and cells harvested for qPCR and western blots.

10T1/2 (ATCC) were cultured and maintained in DMEM with 10% FBS. Prior to migration assays 10T1/2 cells were differentiated with 1ng/mL TGF- $\beta$  in DMEM.

CCR-1 (J-113863) and CCR-2 (sc-202525) antagonists were purchased from Tocris Bioscience and Santa Cruz respectively. SPP1 antibodies AF808 and SC-10593 purchased from R&D Systems and Santa Cruz for the neutralization and western blot respectively.

### Real-time PCR

Total RNA was isolated from mouse tissue and cultured cells using the TRIZOL (Invitrogen) and Turbocapture (Qiagen) method, respectively. Samples for real-time PCR analyses were reverse transcribed (Applied Biosystems), and quantitative real-time PCRs were performed on the cDNAs in the presence of fluorescent dye (SYBR green; Bio-Rad). Relative expression levels were determined using the comparative cycle threshold method. The qPCR data was normalized against control primers for mu hprt, mu tbp and mu 36B4 (see Supplement Table II)

## **ELISA**

Angiogenic gene panel ELISA was performed by Aushon Biosystems, Bellirica, MA using their Searchlight Assay services.

## **Measurement of Intravascular Volume**

Intravascular volume was measured by injecting  $^{125}\text{I}$ -BSA intravenously into wild type and PGC-1 $\alpha$  transgenic mice after 4 weeks of transgene induction. The tracer was allowed to circulate for 5 minutes and then the amount of radioactivity in the muscle was measured in a gamma counter <sup>4</sup>.

## **Lectin and Evans Blue injections**

Animals were anesthetized with ketamine-xylazine and 50 $\mu\text{L}$  of Alexafluor 594 Isolectin GS-IB4 (Molecular Probes, Invitrogen) was administered intravenously, muscle harvested and embedded in OCT after 10 min. Evans blue dye (1% solution) was i.p.-injected at a concentration of 1% volume per gram of body weight. After 16 h, mice were sacrificed and skeletal-muscle frozen histological sections were prepared. Evans blue incorporation was analyzed by fluorescence microscopy<sup>5</sup>.

## **Endothelial cell migration assay**

Differentiated C2C12 myotubes in 24-well plates were infected with adenovirus expressing GFP or PGC-1 $\alpha$  for 34 h. BSA or soluble Flt1 (100 ng/ml; R & D Systems) was added to the medium for 12 h. Then,  $5 \times 10^4$  cells of HUVECs were plated on the upper compartment of transwells (8.0  $\mu\text{m}$  pore size) prewarmed with EBM-2 medium for 16 h at 37°C. HUVEC migration to the lower compartment of transwells was measured after 12 h. Migrated HUVECs were fixed with 4% paraformaldehyde in PBS for 20 min at RT, and cells that remained in the upper compartment were removed with cotton swabs. Cells were blocked with 5% BSA in PBS-Tween 20 (PBST; 0.2% Tween 20) and stained with phalloidin-FITC in PBST for 4 h to visualize filamentous actin. Transwell inserts were washed three times in PBST and mounted onto slides with DAPI mounting medium.

## **Conditioned Medium Preparation**

C2C12 myotubes were infected with PGC-1 $\alpha$  retrovirus selected for puromycin to obtain a stable cell line. These cells were incubated in serum free DMEM and the PGC-1 $\alpha$ -conditioned medium was collected after 48 hrs. For preparation of SPP1 conditioned medium, HEK293T cells were transiently transfected with SPP1 expression plasmid and the transfection medium was changed to DMEM plus 0.5% FBS after 24hrs. This conditioned medium was collected after 48hrs. For THP-1 conditioned medium experiments, differentiated THP-1 cells were incubated with control or PGC-1 $\alpha$  CM and then cocultured with HUVECs, pericytes or smooth muscle cells in transwell inserts and migration was measured after 12h as described in the previous section.

## **Western Blotting**

Conditioned media from C2C12s overexpressing either PGC-1 $\alpha$  or control virus were processed for western blotting (conditioned media from HEK 293 cells overexpressing SPP1 was used as a positive control). Media was collected after 48hrs and subjected to electrophoresis on 4-12% Bis-Tris gels (Invitrogen) and transferred to nitrocellulose membranes (BioRad) for Western blot analysis. SPP1 antibody (SC-10593 Santa Cruz) was used and bands were detected by chemiluminescence following the manufacturer's instructions.

### **Hind limb ischemia**

Animals were anesthetized with ketamine-xylazine and shaven anteriorly distal to the midriff, including both hind limbs. A skin incision was made over the left femoral artery, just distal to the inguinal ligament. The femoral artery was then visualized and ligated proximally at the inguinal ligament and again approximately 1cm distally, and the section of the artery between the two ligatures was removed. Cautery was used to control the bleeding, and three injections of  $1 \times 10^8$  pfu adeno-PGC-1 $\alpha$  versus adeno-GFP control were done, two in the inner thigh and one in the gastrocnemius. The incision was then closed with sutures and the mice were monitored throughout the recovery process. The recovery of blood flow was tracked non-invasively by infrared Doppler scanning of the lower limb, excluding the foot<sup>6</sup>. Ambulatory score was as follows: 0=no impairment, 1=no toe flexion, 2=no plantar flexion, 3=no use of foot. Tissue necrosis score was: 0=no necrosis, 1=discoloration, 2=loss of 1-2 toes, 3=loss of 3-5 toes, 4=necrosis of the foot.

### **Microarray analysis**

RNA was extracted from the WT and PGC-1 $\alpha$  transgenics after 4 weeks of PGC-1 $\alpha$  expression using the TRIZOL (Qiagen) method and used to probe Affymetrix mouse 1.0 gene arrays by the Dana Farber Cancer Institute, Boston, MA. The data obtained was analyzed using the Gene Set Enrichment Analysis (Broad Institute of MIT and Harvard).

### **Histological analysis**

Quantification of capillaries was performed computationally, using Volocity (Improvision; PerkinElmer) and ImageJ software, on three random fields chosen from the mid portions of transverse sections from the indicated muscles. All choices of random fields and quantifications were performed blind.

### **Hemodynamic measurements**

Invasive hemodynamic measurements were performed by the BIDMC Mouse Cardiac Physiology Core. Animals were anesthetized with isoflurane via precise vaporizer. The right carotid artery was dissected and catheterized with a 1.0-Fr high-fidelity pressure catheter (Scisense). The catheters were advanced to the left ventricular (LV) chamber to obtain pressure volume (PV) loop data. Pressure signals were recorded at 2 kHz for 60 min, and analyzed using PowerLab software (Chart 4.1.2, ADInstruments). For blood pressure (BP) measurement a 1.2 Fr pressure catheter from Millar was used, measurements were recorded in carotid artery (not advanced to LV).

### **Vascular Cast and Micro-CT**

Animals were anesthetized with ketamine-xylazine and perfused through the left ventricle with 20mls of 37°C heparinized saline (10U/ml heparin) followed by 20mls of formalin. After formalin perfusion, mice were perfused with 20mls of MICROFIL Yellow (Flow Tech Inc), MICROFIL was allowed to cure overnight at 4°C. Once the cast was set, hindlimbs were removed and scanned in a uCT35 scanner (Scanco Medical USA, Wayne PA) with the following conditions a 6  $\mu$ m voxel size, 55 kVp, and 144  $\mu$ A.

### **Statistical analysis**

The data are presented as means  $\pm$  SE. Statistical analysis was performed with Student's *t*-test for all in vitro and in vivo experiments. P-values of  $<0.05$  were considered statistically significant.

## SUPPLEMENTAL FIGURES

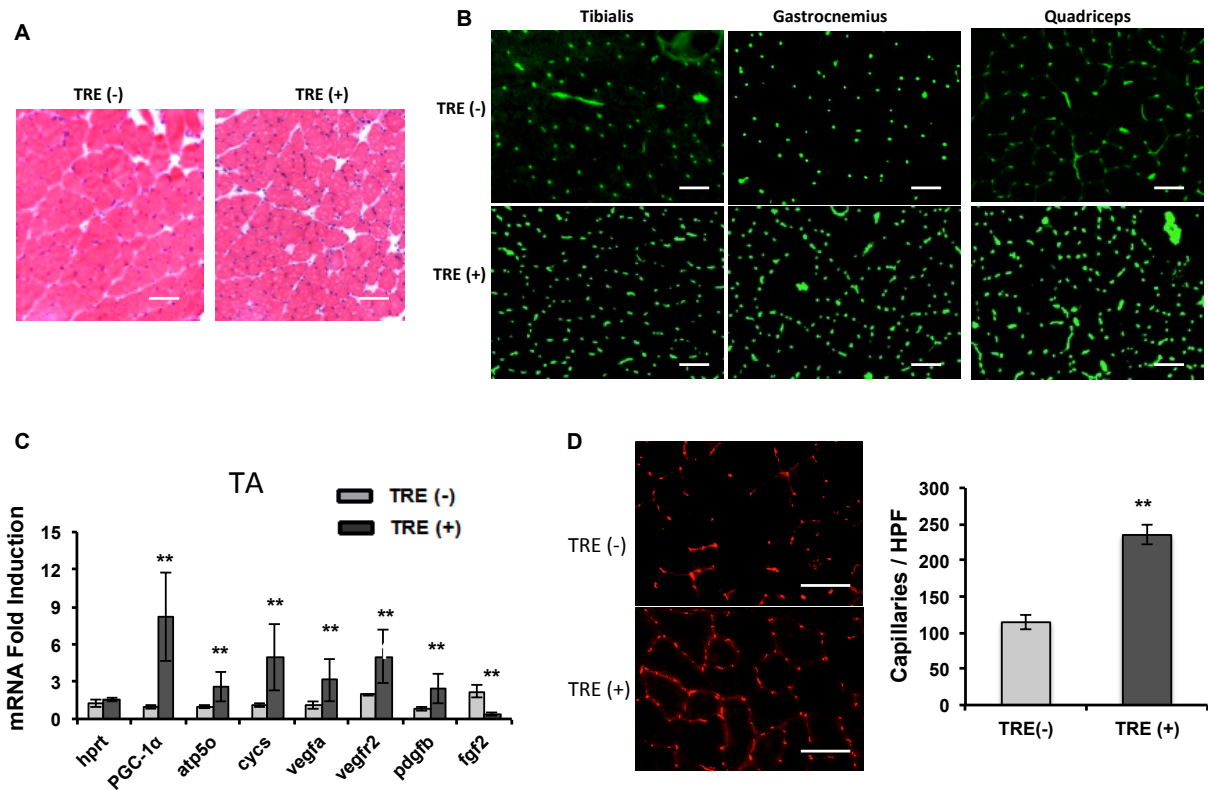

## Supplemental Figure I

**A**, Hemotoxylin and eosin (H&E) staining of quadriceps muscle of PGC-1 $\alpha$  expressing TRE (-) and TRE (+) mice. **B**, Capillary density in the tibialis, gastrocnemius and quadriceps muscle of TRE (-) and TRE (+) mice. **C**, Expression of mitochondrial and angiogenic genes in the tibialis muscles after 4 weeks of doxy removal. **D**, Capillary density measured by CD144 staining; sample images on left, and quantification on right. scale bar = 100 $\mu$ m. N=4/group, \*\* significance with P<0.01.

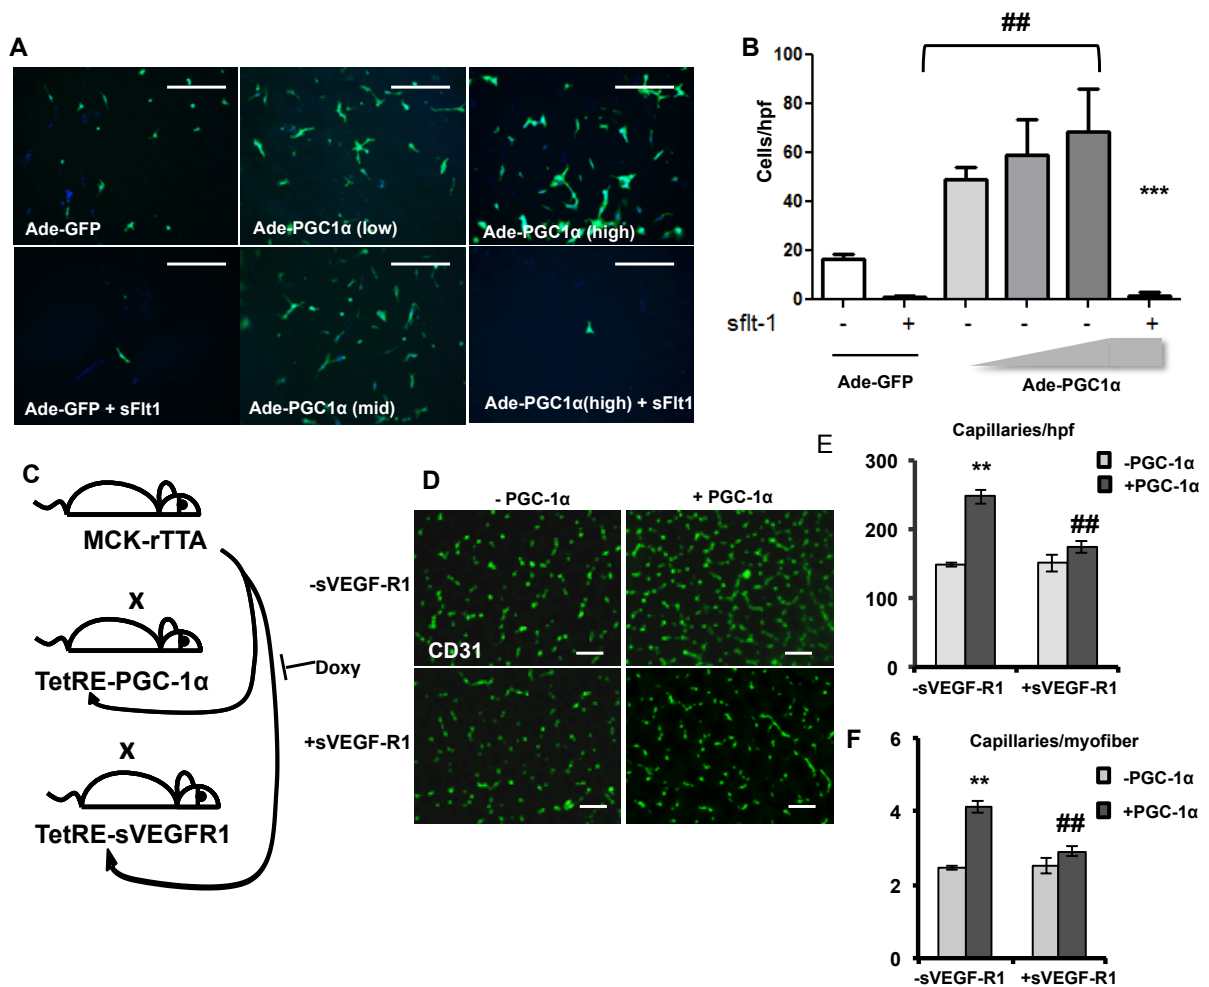

### Supplemental Figure II: PGC-1 $\alpha$ -mediated angiogenesis in skeletal muscle is VEGF-dependent

**A**, Endothelial cells (HUVECs) stained with phalloidin-FITC and DAPI (4, 6-diamidino-2-phenylindole), after migration in response to medium conditioned by C2C12 myotubes overexpressing PGC-1 $\alpha$  versus GFP control. **B**, Quantification of migrated cells in **A** (hpf: high power field). **C**, Generation of mice expressing muscle specific sVEGFR-1 and PGC-1 $\alpha$  under the control of the ‘tet-off’ promoter. Removal of doxycycline from chow results in the induction of PGC-1 $\alpha$  and sVEGFR1 transgenes. **D**, Capillary density in the quadriceps muscle after 4 weeks of doxy chow removal. **E**, Quantification of capillary numbers per hpf and per myofiber. Error bars indicate SE. N=8/group, # \* Significance with P<0.05, \*\*P<0.01, \*\*\*P<0.001. scale bar = 100 $\mu$ m.

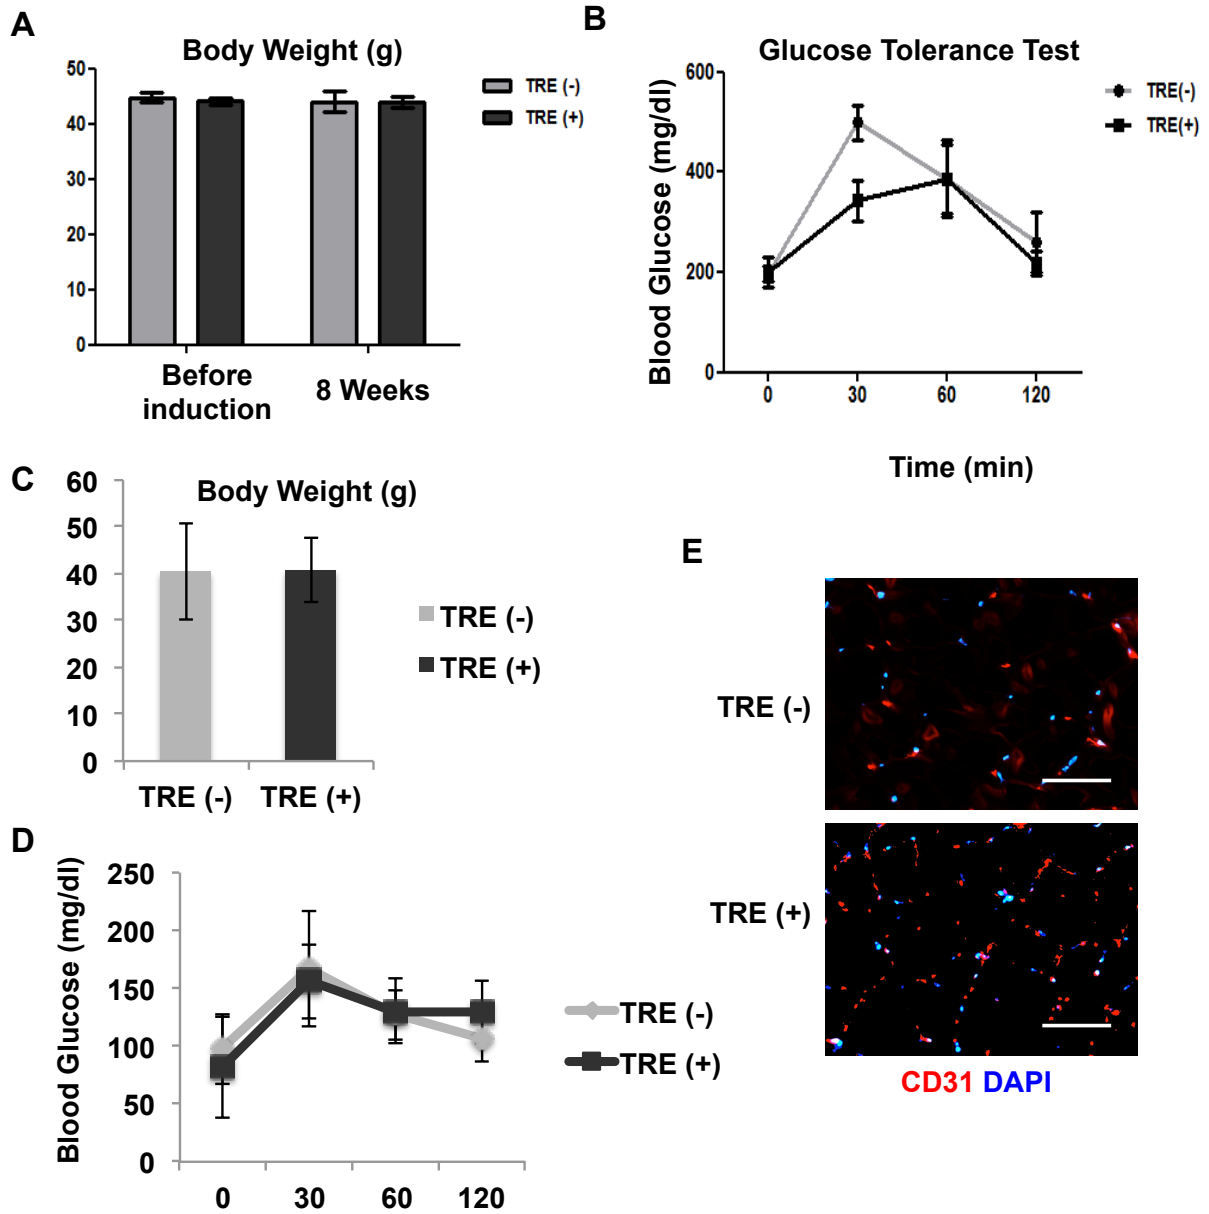

### Supplemental Figure III

**A**, Body weights of TRE (-) and TRE (+) 2 yr-old high fat-fed diabetic mice. **B**, Glucose tolerance test of TRE (-) and TRE (+) old high fat-fed diabetic mice. **C**, Body weights of TRE (-) and TRE (+) 2 yr-old chow-fed mice. **D**, Glucose tolerance test of TRE (-) and TRE (+) 2-yr-old chow-fed mice. **E**, capillary density in TRE (-) and TRE (+) 2-yr-old chow-fed mice. scale bar = 100 $\mu$ m.

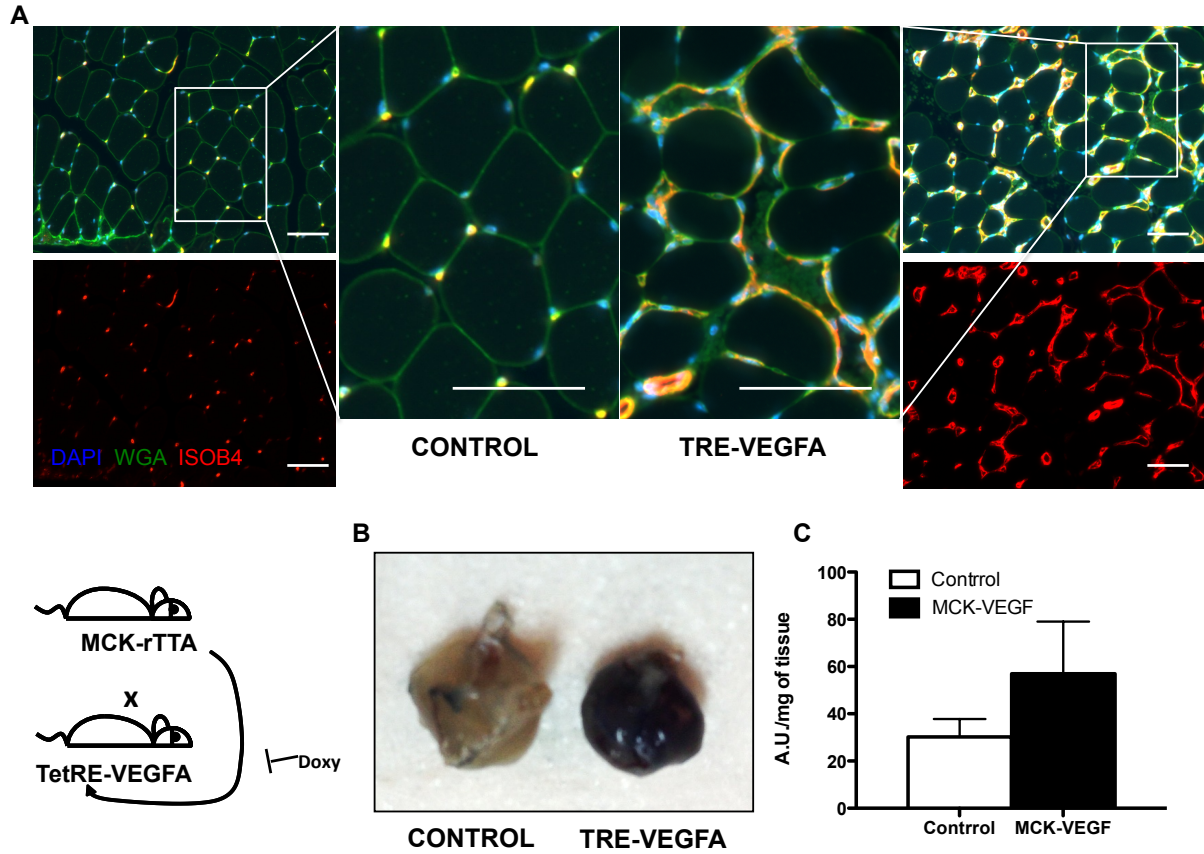

#### Supplemental Figure IV

**A**, Neovascularization in gastrocnemius of TRE (+) VEGFA mice. **B**, Evans Blue Dye leak into gastrocnemius of TRE (+) VEGFA mice. **C**, Quantification of B.



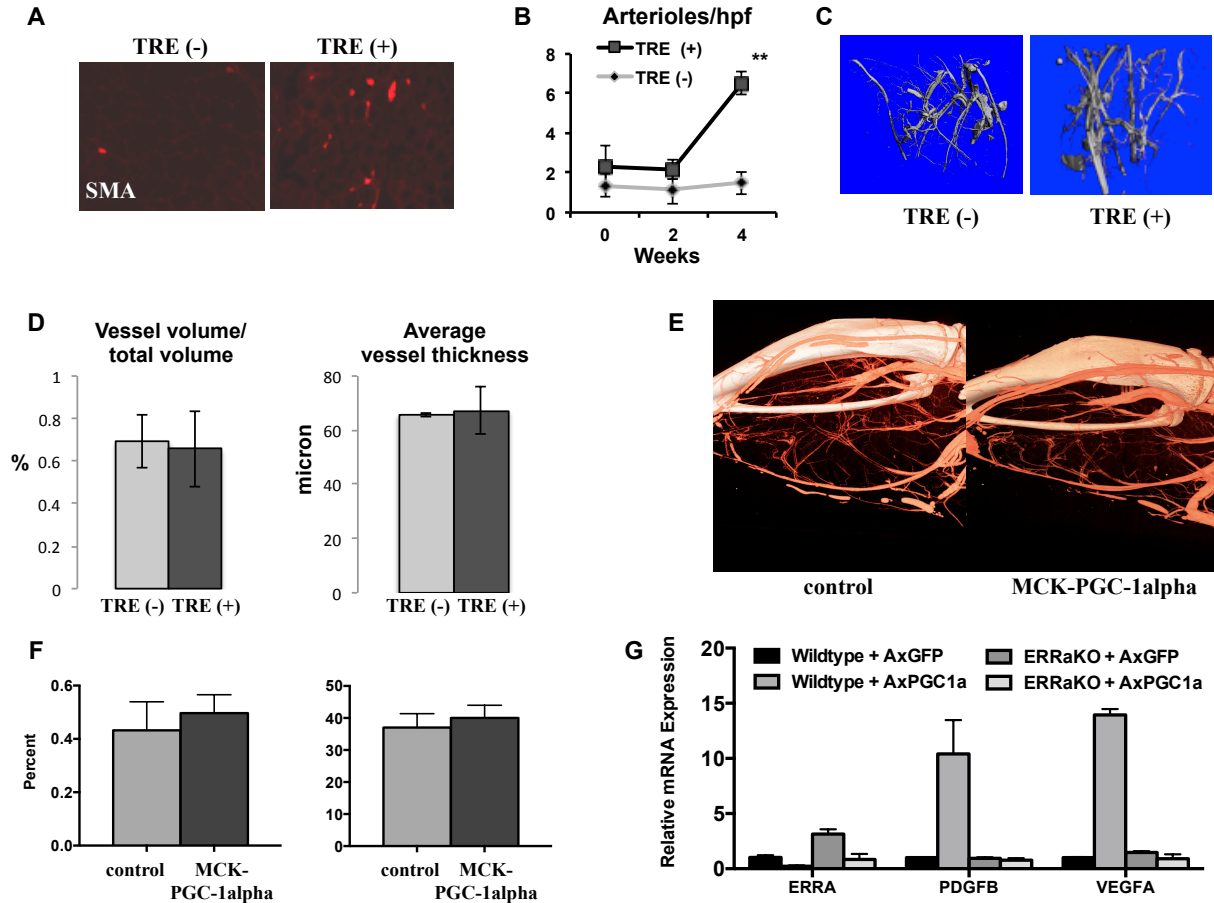

### Supplemental Figure V

**A**, Arteriolar density of TRE (-) and TRE (+) quadriceps muscle after 4 weeks of PGC-1 $\alpha$  induction. **B**, Quantification of arterioles at 0, 2 and 4 weeks of PGC-1 $\alpha$  transgene expression. **C**, MicroCT visualization of arteries in TRE (-) and TRE (+) animals. **D**, Quantification of **C**. **E**, MicroCT visualization of arteries in control and MCK-PGC-1 $\alpha$  animals. **F**, Quantification of **E**. **G**, gene expression of the indicated genes in primary skeletal muscle cells either ERR $\alpha$  -/- (ERR $\alpha$ KO) vs wildtype control, 48hrs after infection with adeno-PGC-1 $\alpha$  (AxPGC1 $\alpha$ ) versus GFP-encoding control. Error Bars are SE. N=4/group, \*\* significance with P<0.01. scale bar = 100 $\mu$ m.

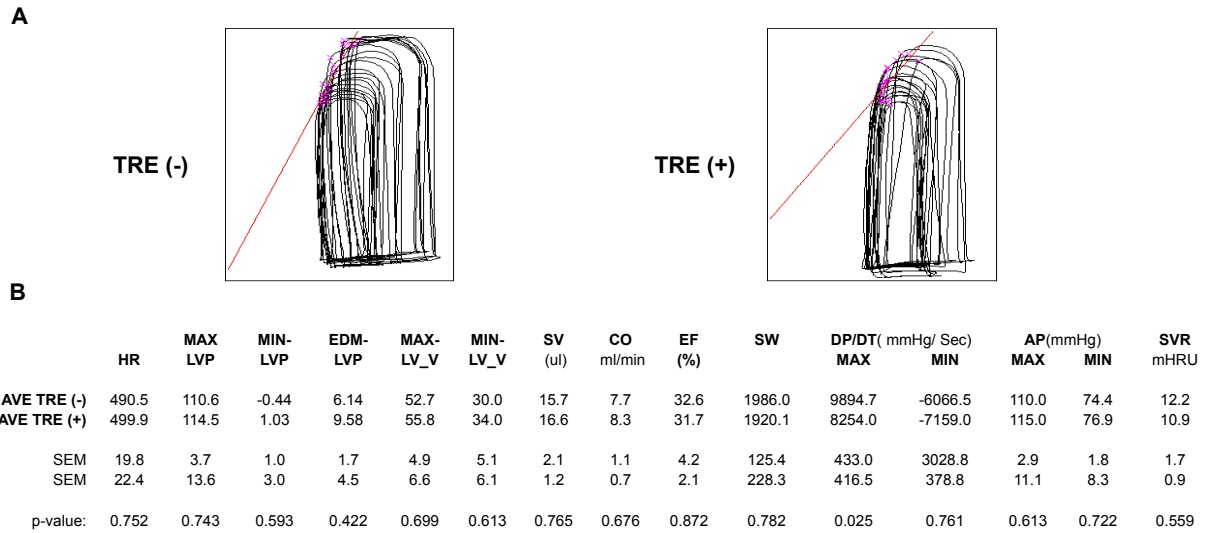

### Supplemental Figure VI

**A**, Representative Frank Starling curves from TRE (-) and TRE (+) hearts. **B**, Invasive hemodynamic measurements in TRE (-) and TRE (+) hearts. N=5 per group.

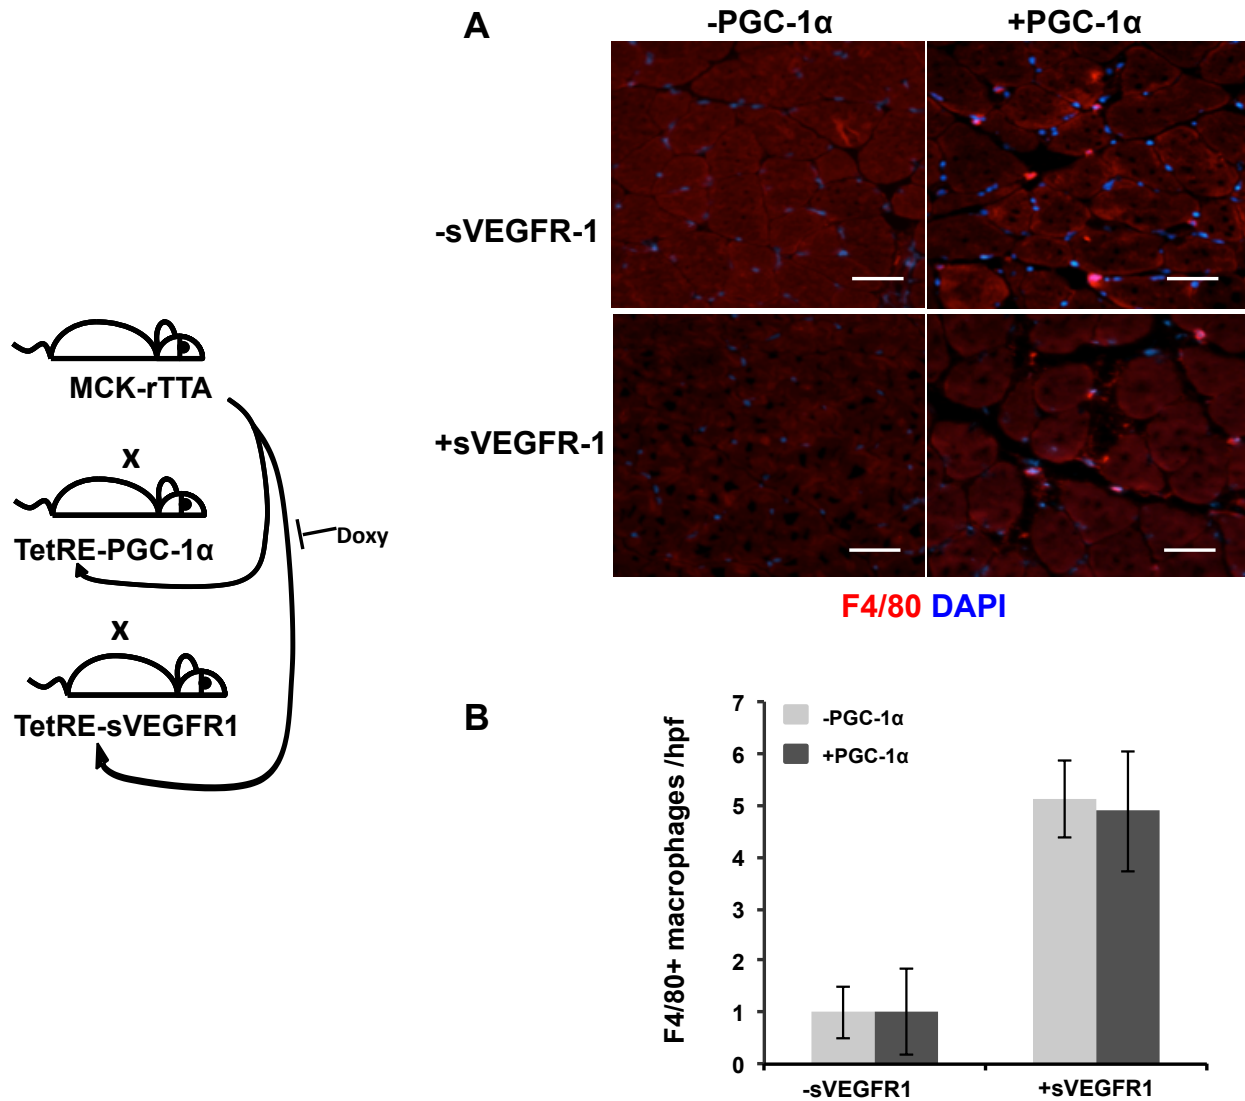

### Supplemental Figure VII

**A**, Representative images of F4/80 staining in gastrocnemius mice expressing muscle specific sVEGFR-1 and PGC-1 $\alpha$  under the control of the ‘tet-off’ promoter (see Supplemental Figure II). **B**, Quantification of **A**. scale bar = 100 $\mu$ m.

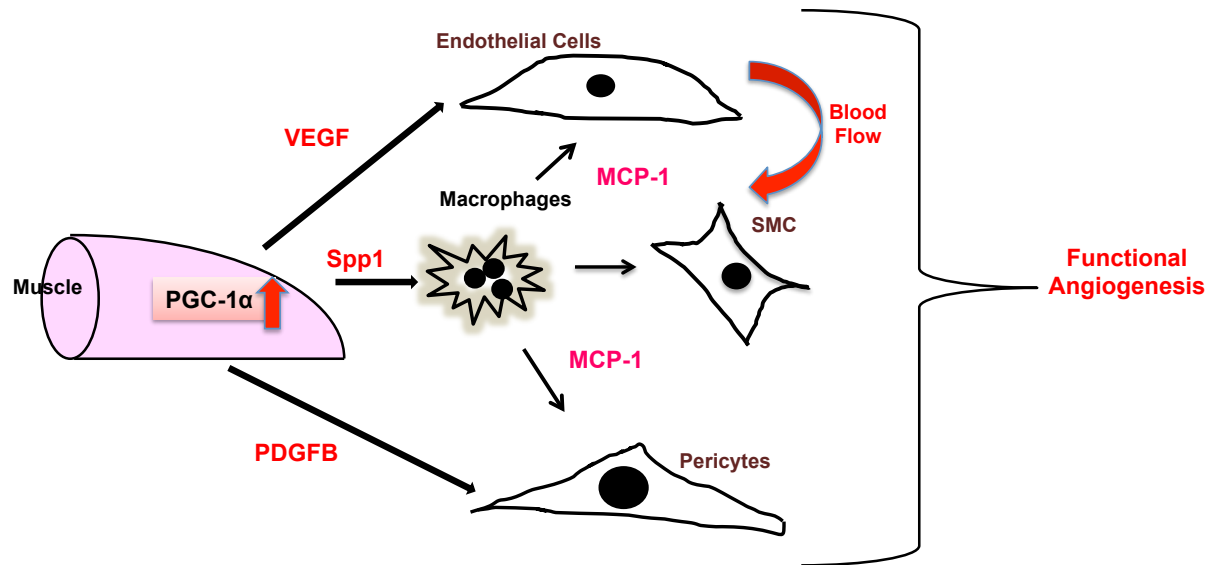

**Supplemental Figure VIII: Model for PGC-1 $\alpha$ -mediated orchestration of different cell types, myokines, and cytokines to mediate functional angiogenesis in skeletal muscle.**

| probe set | gene                                                 | fold change |
|-----------|------------------------------------------------------|-------------|
| 10403911  | Gpx6: glutathione peroxidase 6                       | 11.49       |
| 10569102  | <b>Irf7: interferon regulatory factor 7</b>          | 10.98       |
| 10408557  | <b>Serpinb1a: serine peptidase inhibitor b1a</b>     | 10.04       |
| 10538187  | <b>Gpnmb: glycoprotein nmb</b>                       | 9.07        |
| 10461594  | Ms4a4c: membrane-spanning 4-domains a4c              | 8.71        |
| 10461721  | <b>Mpeg1: macrophage expressed gene 1</b>            | 8.4         |
| 10342666  |                                                      | 8.34        |
| 10494271  | <b>Ctss: cathepsin S</b>                             | 7.78        |
| 10500335  | <b>Fcgr1: Fc receptor, IgG, high affinity I</b>      | 7.58        |
| 10338973  |                                                      | 7.27        |
| 10523717  | <b>Spp1: secreted phosphoprotein 1</b>               | 7.13        |
| 10387536  | <b>Cd68: CD68 antigen</b>                            | 7.12        |
| 10515378  | Hpd1: 4-hydroxyphenylpyruvate dioxygenase-like       | 6.91        |
| 10509985  | Gm693: gene model 693, (NCBI)                        | 6.79        |
| 10348166  | Chrng: cholinergic receptor, nicotinic, gamma        | 6.78        |
| 10598976  | Timp1: tissue inhibitor of metalloproteinase 1       | 6.51        |
| 10524621  | Oasl2: 2'-5' oligoadenylate synthetase-like 2        | 6.49        |
| 10481175  | 1110002H13Rik: RIKEN cDNA 1110002H13 gene            | 6.3         |
| 10339373  |                                                      | 6.24        |
| 10342868  |                                                      | 6.16        |
| 10461636  |                                                      | 6.13        |
| 10547657  | <b>C3ar1: complement component 3a receptor 1</b>     | 6.11        |
| 10603551  | <b>Cybb: cytochrome b-245, beta polypeptide</b>      | 5.99        |
| 10375515  | <b>Ifi47: interferon gamma inducible protein 47</b>  | 5.87        |
| 10565132  | BC048679: cDNA sequence BC048679                     | 5.86        |
| 10509410  | <b>Rap1gap: Rap1 GTPase-activating protein</b>       | 5.64        |
| 10487823  | <b>Siglec1: sialic acid binding Ig-like lectin 1</b> | 5.38        |
| 10551883  | <b>Tyrobp: TYRO tyrosine kinase binding protein</b>  | 5.33        |
| 10508734  | Ptafr: platelet-activating factor receptor           | 5.27        |

Supplemental Table I. Top genes induced by PGC-1alpha in transgenic animals. In blue: macrophage/monocyte-associated genes.

**Supplemental Table II. Primers for qPCR Analysis**

| Primer Name      | Sequence                        |
|------------------|---------------------------------|
| mHprt F          | GTTAAGCAGTACAGCCCCAAA           |
| mHprt R          | AGGGCATATCCAACAACAACTT          |
| MTbp F           | CCCTATCACTCCTGCCACACCAGC        |
| mTbp R           | GTGCAATGGTCTTTAGGTCAAGTTTACAGCC |
| m36b4 F          | GGAGCCAGCGAGGCCACACTGCTG        |
| m36b4 R          | CTGGCCACGTTGCGGACACCCTCC        |
| mPGC-1 Ex3-5 F   | AGCCGTGACCACTGACAACGAG          |
| mPGC-1 Ex3-5 R   | GCTGCATGGTTCTGAGTGCTAAG         |
| mAtp5o F         | AGGCCCTTTGCCAAGCTT              |
| mAtp5o R         | TTCTCCTTAGATGCAGCAGAGTACA       |
| mu Vegfa F       | CTGTAACGATGAAGCCCTGGAG          |
| mu Vegfa R       | TGGTGAGGTTTGATCCGCAT            |
| mu Pdgb F        | GGCAGCAGCAGAGCCTGCTG            |
| mu Pdgb R        | GTTGGCGTTGGTGCATCGATGAGG        |
| mu CD31 F        | CATTGAGGCGCAGGACCACGTG          |
| mu CD31 R        | GAAGGACTCCTGCACGGTGACG          |
| mu Fgf2(bfgf) F  | GCGAGAAGAGCGACCCACACG           |
| mu Fgf2(bfgf) R  | AAGCCAGCAGCCGTCCATCTTCC         |
| mu Vegfr2 F      | GGTACAGAAATGGAAGGCC             |
| mu Vegfr2 R      | TGGTGAGGATGACCGTGTAG            |
| mu Mpeg1 F       | CTGGATGATAATAGCGTGTGC T         |
| mu Mpeg1 R       | CAAGACAGGTAGTTTCAGGGC           |
| mu CD169 F       | GCTGGTGGACAAGCGTTTC             |
| mu CD169 R       | TTCAAGTCTTTGAGCAACAGGT          |
| mu Irf7 F        | GAGACTGGCTATTGGGGGAG            |
| mu Irf7 R        | GACCGAAATGCTTCCAGGG             |
| mu FcgR1 F       | CAATGGTTTATCAACGGAACAGC         |
| mu FcgR1 R       | ATGCTATAACTAGGCGTGGAGA          |
| mu SPP1 F        | AGCAAGAACTCTTCCAAGCAA           |
| mu SPP1 R        | GTGAGATTTCGTCAGATTCATCCG        |
| mu Cathepsin S F | AGA AGG GCT GCG TCA CTG AG      |
| mu Cathepsin S R | GAA TGT ACC TTG AAC ACG TAG     |
| mu gbnmb F       | CAG GAA TGA TTT GGG ACT GAC C   |
| mu gbnmbR        | CCG GGA ACC TGA GAT GCT G       |
| mu GAPDH f       | AGGTCCGGTGTGAACGGATTTG          |
| mu GAPDH r       | TGTAGACCATGTAGTTGAGGTCA         |
| hu cd14 f        | ACGCCAGAACCTTGTGAGC             |
| hu cd14 r        | GCATGGATCTCCACCTCTACTG          |
| hu mip1b(ccl4) f | GATTACTATGAGACCAGCAGCC          |

|                   |                          |
|-------------------|--------------------------|
| hu mip1b(cc14) r  | TTCAGTTCAGGTCATACACG     |
| hu MCP-1 (cc12) f | CAGAAGTGGGTTTCAGGATTCC   |
| hu MCP-1 (cc12) r | ATTCTTGGGTTGTGGAGTGAG    |
| hu ccl7 f         | AGACCAAACCAGAAACCTCC     |
| hu ccl7 r         | TGAGCAGCAGACACAGAAG      |
| huTNFa f          | AGGTCTACTTTGGGATCATTGC   |
| huTNFa r          | GAAGAGGTTGAGGGTGTCTG     |
| hu IL6 f          | AAATTCGGTACATCCTCGACGG   |
| hu IL6 r          | GGAAGGTTTCAGGTTGTTTTCTGC |
| hu il8 f          | ACTGAGAGTGATTGAGAGTGGAC  |
| hu il8 r          | AACCCTCTGCACCCAGTTTTTC   |
| hu il1m f         | CCTCATGCTCTGTTCTTGGG     |
| hu il1m r         | TGTCCTGCTTTCTGTTCTCG     |
| hu CD163 f        | ACTTGAAGACTCTGGATCTGCT   |
| hu CD163 r        | CTGGTGACAAAACAGGCACTG    |
| hu CD206 f        | GCTCCTGGTTTTTGCCTCTGT    |
| hu CD206 r        | CACTGGGACTCACTGCATCC     |
| hu CD169 f        | GCTGGTGGACAAGCGTTTC      |
| hu CD169 r        | TTCAAGTCTTTGAGCAACAGGT   |

**SUPPLEMENTAL REFERENCES**

1. Wende AR, Schaeffer PJ, Parker GJ, Zechner C, Han DH, Chen MM, Hancock CR, Lehman JJ, Huss JM, McClain DA, Holloszy JO, Kelly DP. A role for the transcriptional coactivator pgc-1alpha in muscle refueling. *J Biol Chem*. 2007;282:36642-36651
2. May D, Gilon D, Djonov V, Itin A, Lazarus A, Gordon O, Rosenberger C, Keshet E. Transgenic system for conditional induction and rescue of chronic myocardial hibernation provides insights into genomic programs of hibernation. *Proc Natl Acad Sci U S A*. 2008;105:282-287
3. Rowe GC, Patten IS, Zsengeller ZK, El-Khoury R, Okutsu M, Bampoh S, Koullis N, Farrell C, Hirshman MF, Yan Z, Goodyear LJ, Rustin P, Arany Z. Disconnecting mitochondrial content from respiratory chain capacity in pgc-1-deficient skeletal muscle. *Cell Rep*. 2013;3:1449-1456
4. Nagy JA, Dvorak AM, Dvorak HF. Vascular hyperpermeability, angiogenesis, and stroma generation. *Cold Spring Harb Perspect Med*. 2012;2:a006544
5. Handschin C, Kobayashi YM, Chin S, Seale P, Campbell KP, Spiegelman BM. Pgc-1alpha regulates the neuromuscular junction program and ameliorates duchenne muscular dystrophy. *Genes Dev*. 2007;21:770-783
6. Couffignal T, Silver M, Zheng LP, Kearney M, Witzensbichler B, Isner JM. Mouse model of angiogenesis. *Am J Pathol*. 1998;152:1667-1679
